# Supplementary material for: Tunable yellow–green emitting cyclotriphosphazene appended phenothiazine hydrazone hybrid material: synthesis, characterisation, photophysical and electrochemical studies
Source: Royal Society of Chemistry journal article supplement (doi:10.1039/d0nj02976a), 2020-01-01
Supplement: d0nj02976a1.pdf [file d0nj02976a1.pdf]

*Electronic Supplementary Information (ESI)*

**Tunable Yellow-Green Emitting Cyclotriphosphazene Appended  
Phenothiazine Hydrazone Hybrid Material: Synthesis, Characterisation,  
Photophysical and Electrochemical studies**

Dinesh Kumar Chelike, <sup>†</sup> Ananthan Alagumalai, <sup>†</sup> Muthukumar V. R., <sup>§</sup>

Senthil A. Gurusamy Thangavelu<sup>†\*</sup> Ananthanarayanan Krishnamoorthy <sup>†\*</sup>

<sup>†</sup> Department of Chemistry, <sup>§</sup>Department of Physics and Nanotechnology, SRM Institute of Science  
and Technology, Kattankulathur, Chennai 603203, Tamil Nadu India

| <b>Contents</b> |                                                             | <b>Page</b> |
|-----------------|-------------------------------------------------------------|-------------|
| SI1             | <sup>1</sup> H and <sup>13</sup> C NMR spectra of R-PTZ-CHO | 2           |
| SI2             | HRMS of R-PTZ-CHO                                           | 3           |
| SI3             | MALDI-TOF data of CTP-Hyd                                   | 3           |
| SI4             | Photograph of the as synthesised CTP-PTZ                    | 4           |

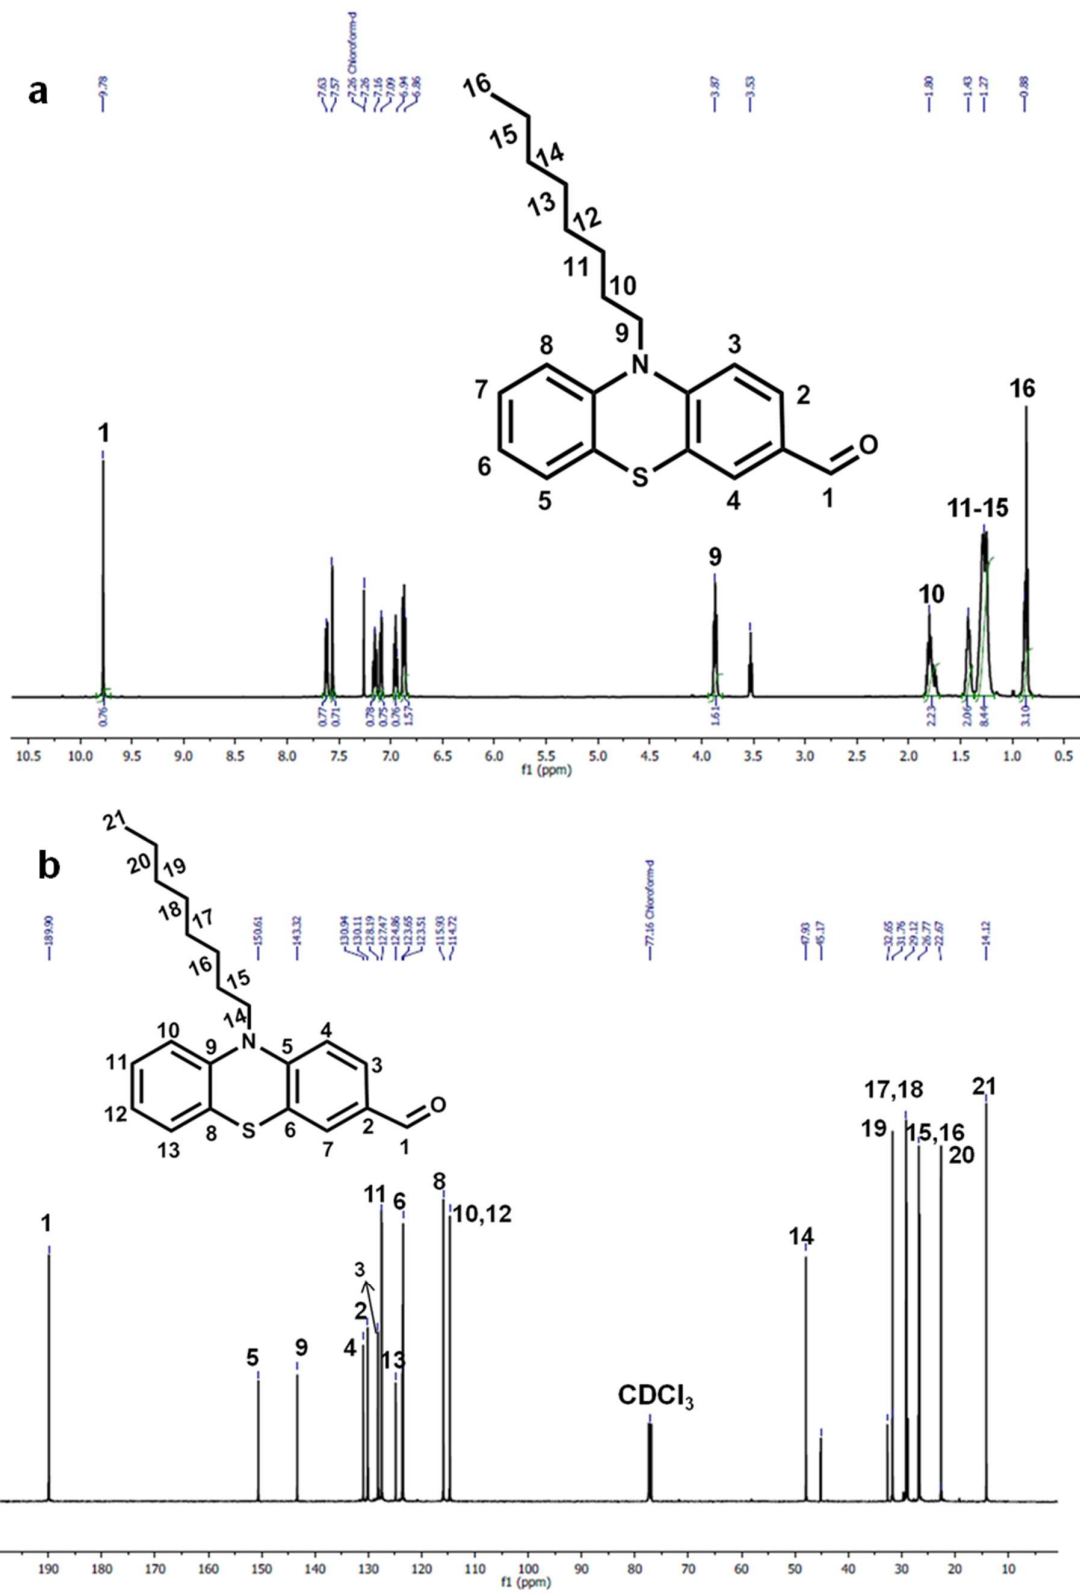

**Fig. S1.** a)  $^1\text{H}$  and b)  $^{13}\text{C}$  NMR of N-alkyl phenothiazine aldehyde, R-PTZ-CHO ( $\text{R}=\text{C}_8\text{H}_{17}$ )

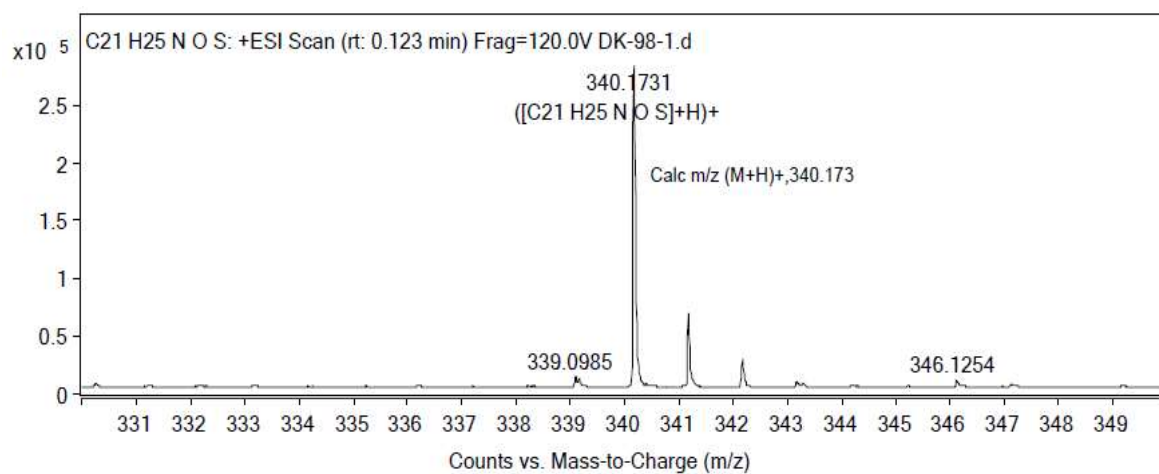

**Fig. S2** High resolution mass spectral (HRMS) data of R-PTZ-CHO.

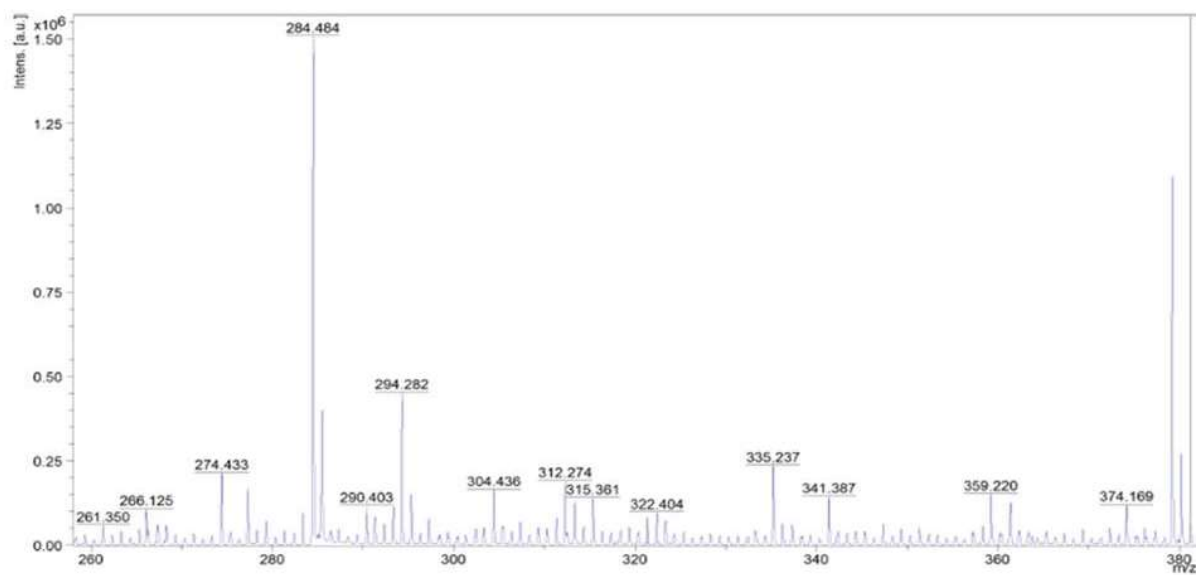

**Fig. S3** MALDI-TOF data of hexakis hydrazide cyclotriphosphazene, CTP-Hyd.

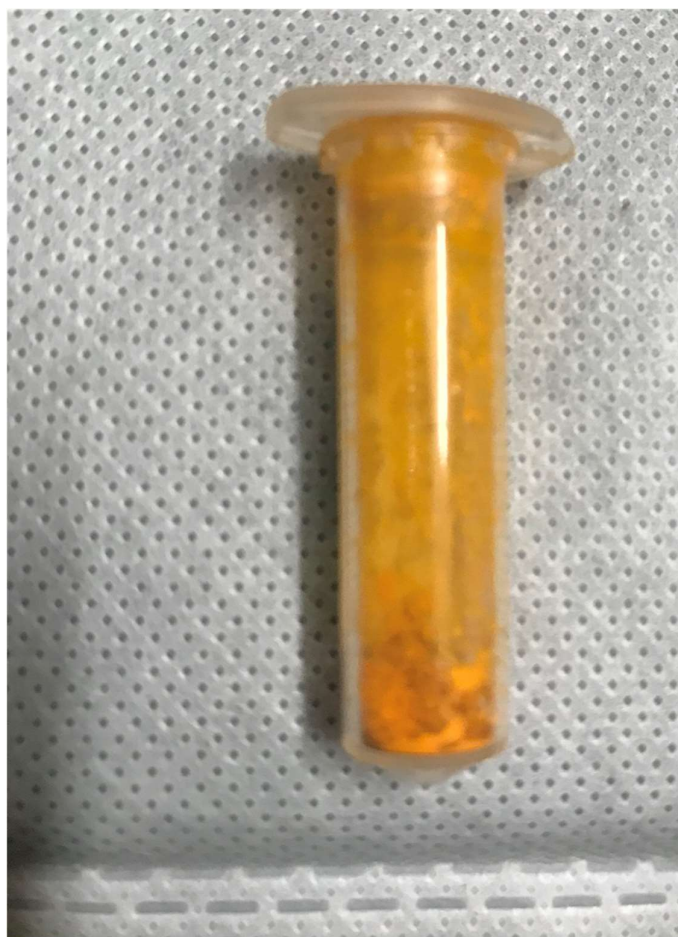

**Fig. S4** Photograph of the as synthesised inorganic-organic hybrid, CTP-PTZ
